# Supplementary material for: New markers for tracking endoderm induction and hepatocyte differentiation from human pluripotent stem cells
Source: Oxford University Press journal article supplement (doi:10.1242/dev.121020), 2015-01-01
Supplement: dev121020supp.pdf [file dev121020supp.pdf]

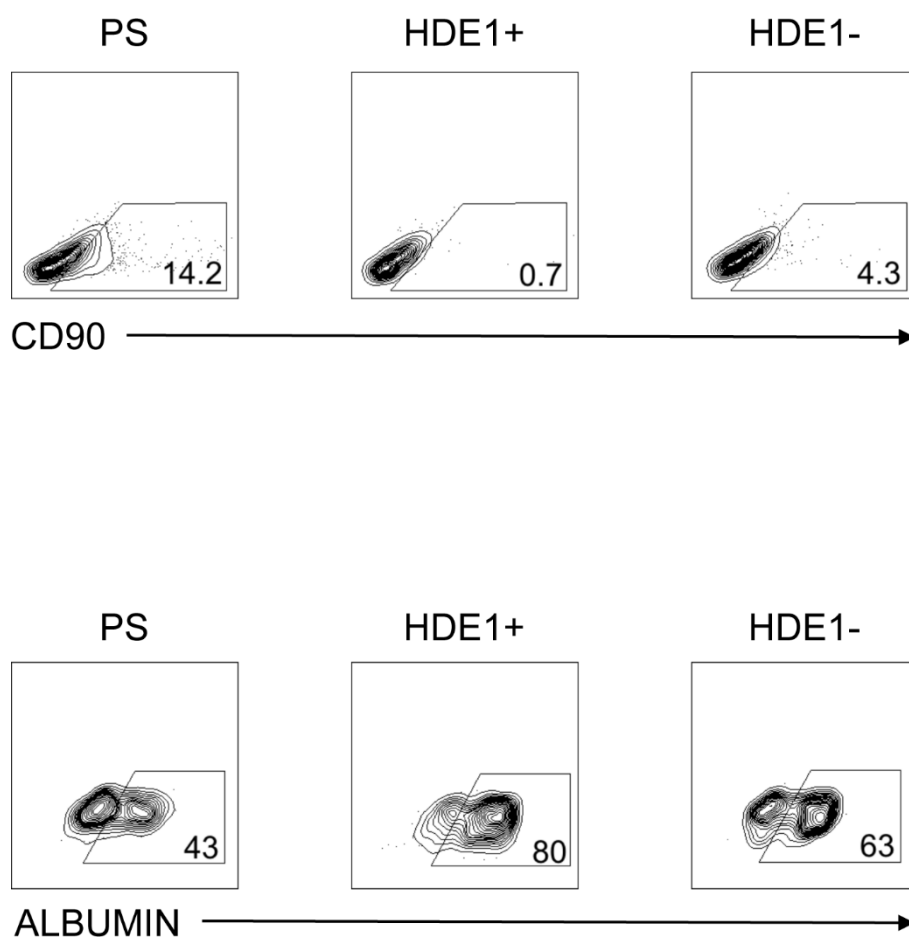

**Figure S1. Analysis of the proportion of CD90<sup>+</sup> and ALB<sup>+</sup> cells in HDE1<sup>+</sup> and HDE1<sup>-</sup> derived populations.** Representative flow cytometric analyses of CD90 and ALB staining in populations derived from presort (PS), HDE1<sup>+</sup> and HDE2<sup>+</sup> cells following 28 days of culture as described in figure 3B.

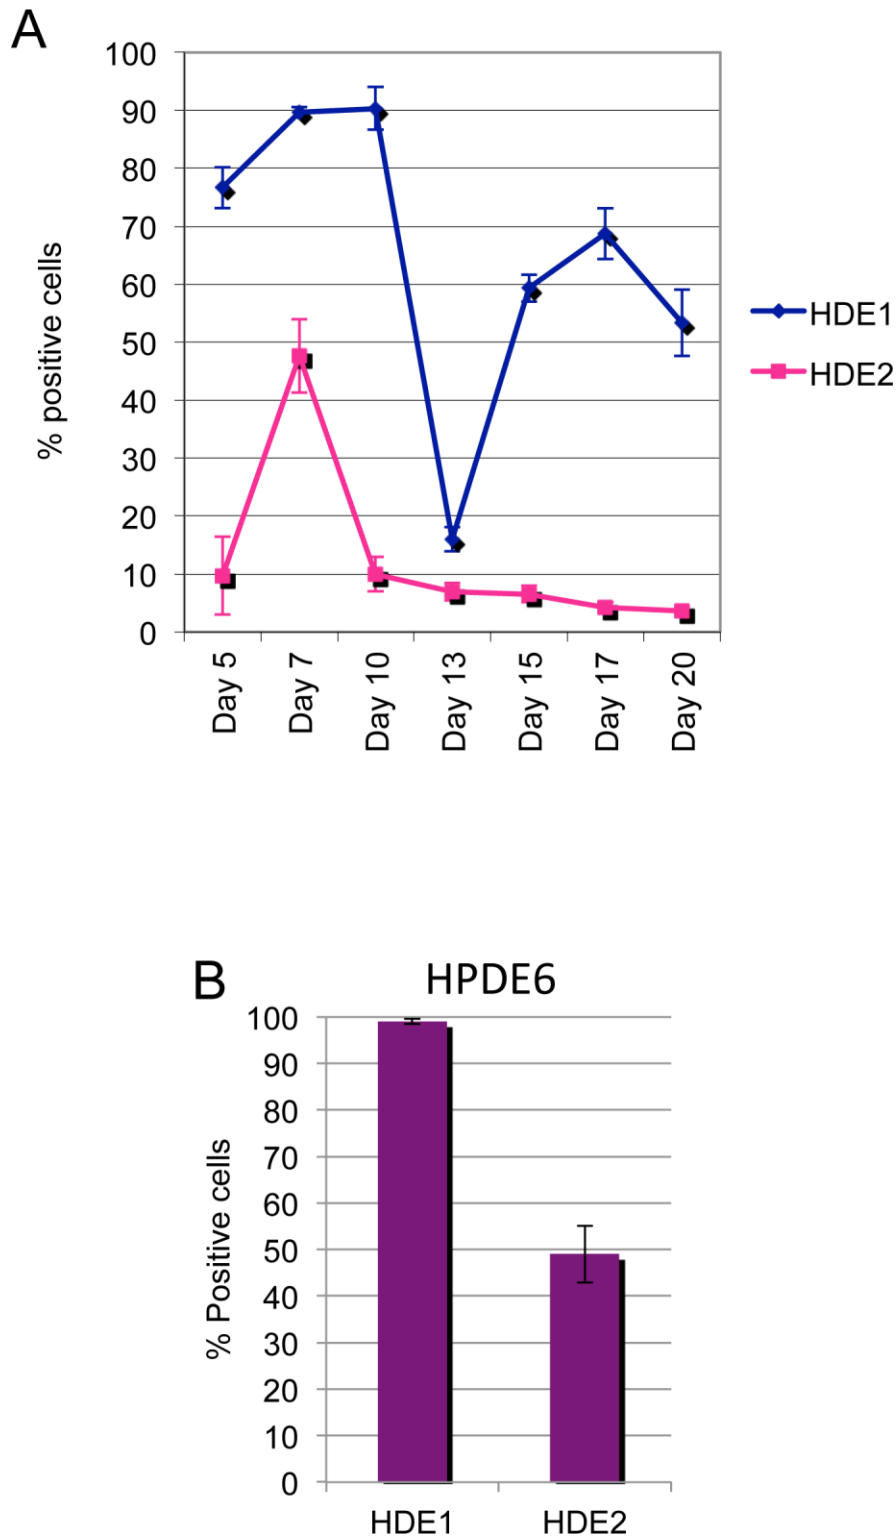

**Figure S2. HDE1 and HDE2 staining patterns on hESCs-derived pancreatic populations and on HPDE6 cells.** (A) Flow cytometric analyses of HDE1 and HDE2 staining at the indicated time of pancreatic differentiation of HES2 hESCs (n=3, data are represented as mean +/- SEM). (B) Flow cytometric analyses of HDE1 and HDE2 staining of the pancreatic duct epithelial cell line HPDE6 (n=3, data are represented as mean +/- SEM).

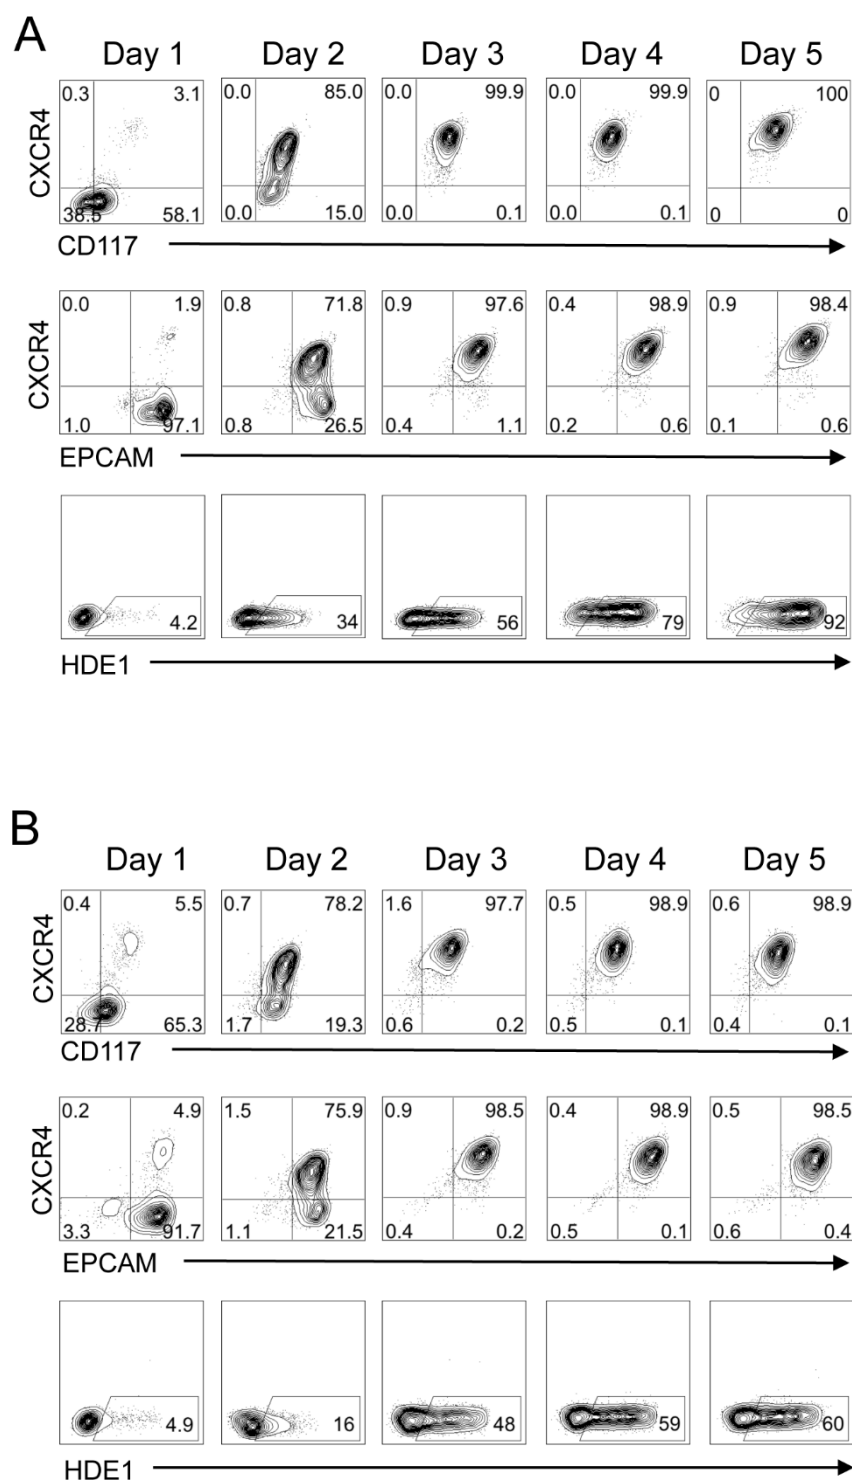

**Figure S3. HDE1 and HDE2 staining patterns of definitive endoderm induced in monolayer cultures.** (A) Representative flow cytometric analysis of CXCR4, CD117, EPCAM and HDE1 staining of the emerging HES2 hESC-derived endoderm populations induced in monolayer cultures. (B) Representative flow cytometric analysis of CXCR4, CD117, EPCAM and HDE1 staining of the emerging H1 hESC-derived endoderm populations induced in monolayer culture. All FACS plots are representative of the results from 3 independent experiments.

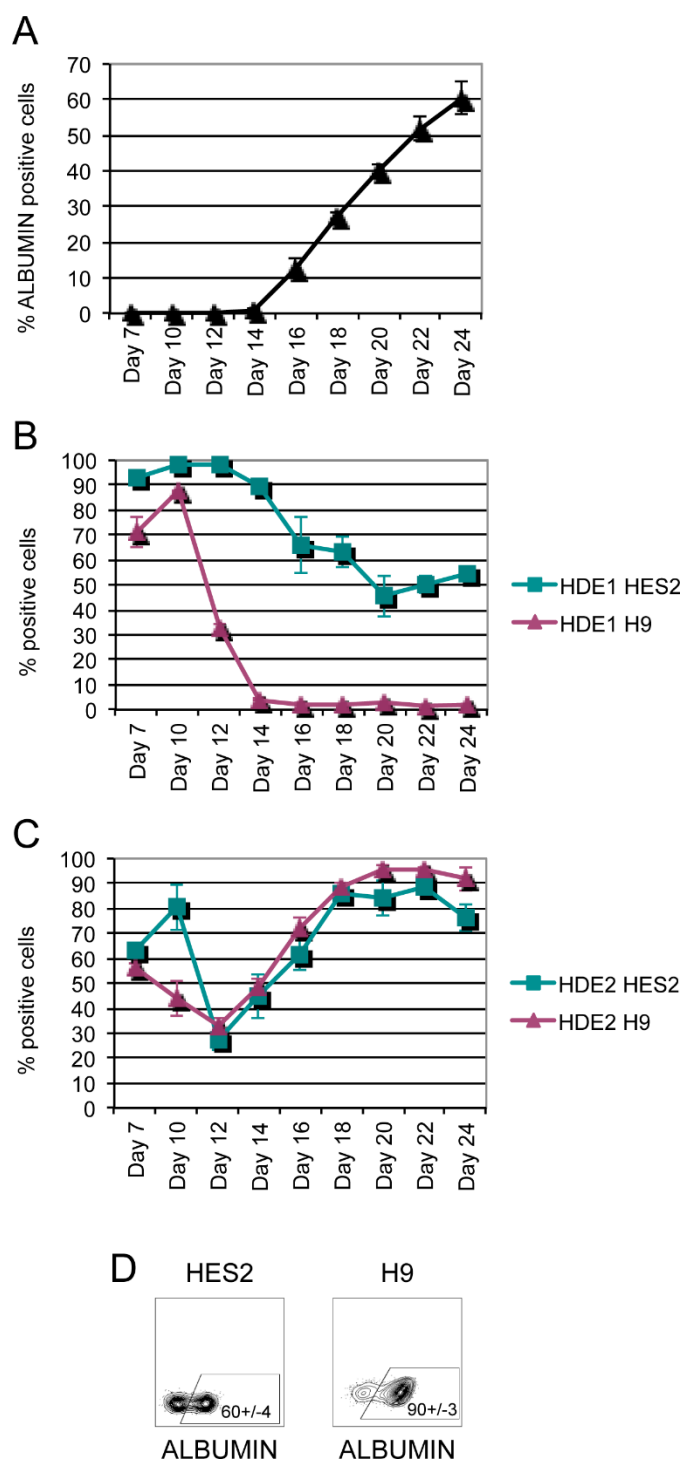

**Figure S4. HDE1 and HDE2 staining patterns of HES2 and H9-derived populations at different stages of hepatic development.** (A) Intra-cellular flow cytometric analysis of ALB staining at the indicated days of hepatic differentiation of HES2 hESCs (n=3, data are represented as mean  $\pm$  SEM). (B) Flow cytometric analysis of HDE1 staining at the indicated days of hepatic differentiation of HES2 and H9 hESCs (n=3, data are represented as mean  $\pm$  SEM). (C) Flow cytometric analysis of HDE2 staining at the indicated days of hepatic differentiation of HES2 and H9 hESCs (n=3, data are represented as mean  $\pm$  SEM). (D) Percentage of ALB<sup>+</sup> cells in day 24 hepatocyte cultures generated from either HES2 (left panel) or H9 (right panel) hESCs. Values were determined by intra-cellular flow cytometric analyses (n=3, data are represented as mean  $\pm$  SEM)

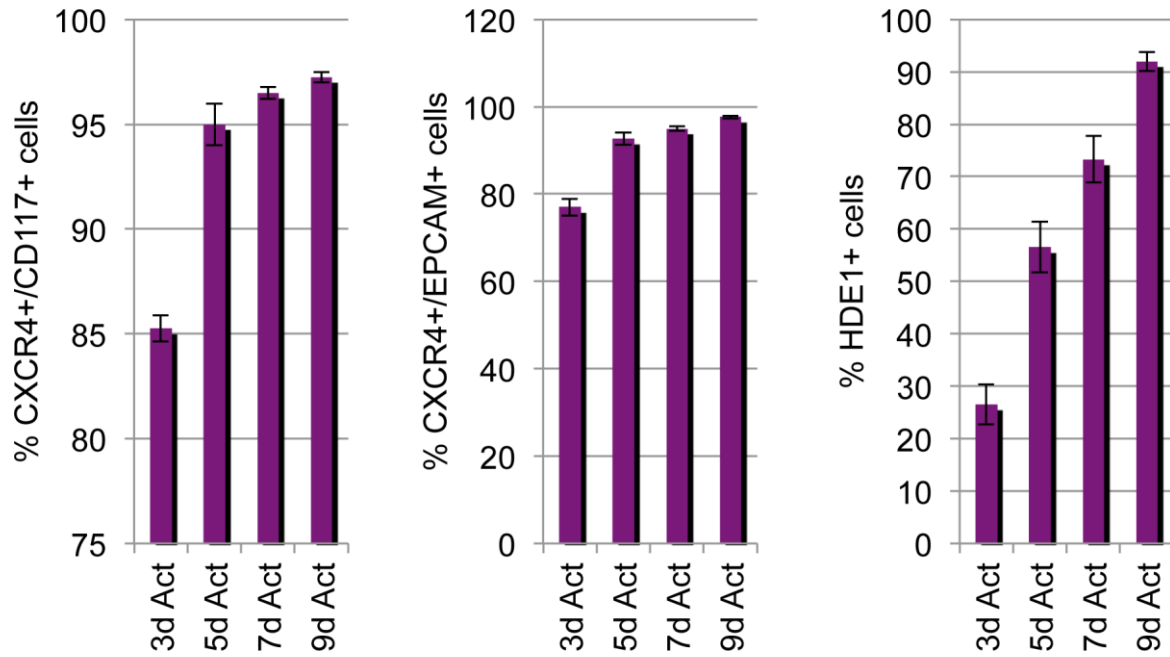

**Figure S5. Analyses of H9 hESC-derived endoderm populations induced with activin A for different periods of time.** Flow cytometric analysis showing the proportion of CXCR4<sup>+</sup>CD117<sup>+</sup> cells, CXCR4<sup>+</sup>EPCAM<sup>+</sup> cells and HDE1<sup>+</sup> cells in H9 hESC-derived populations induced with activin A for the indicated periods of time. (n=3, data are represented as mean +/- SEM).

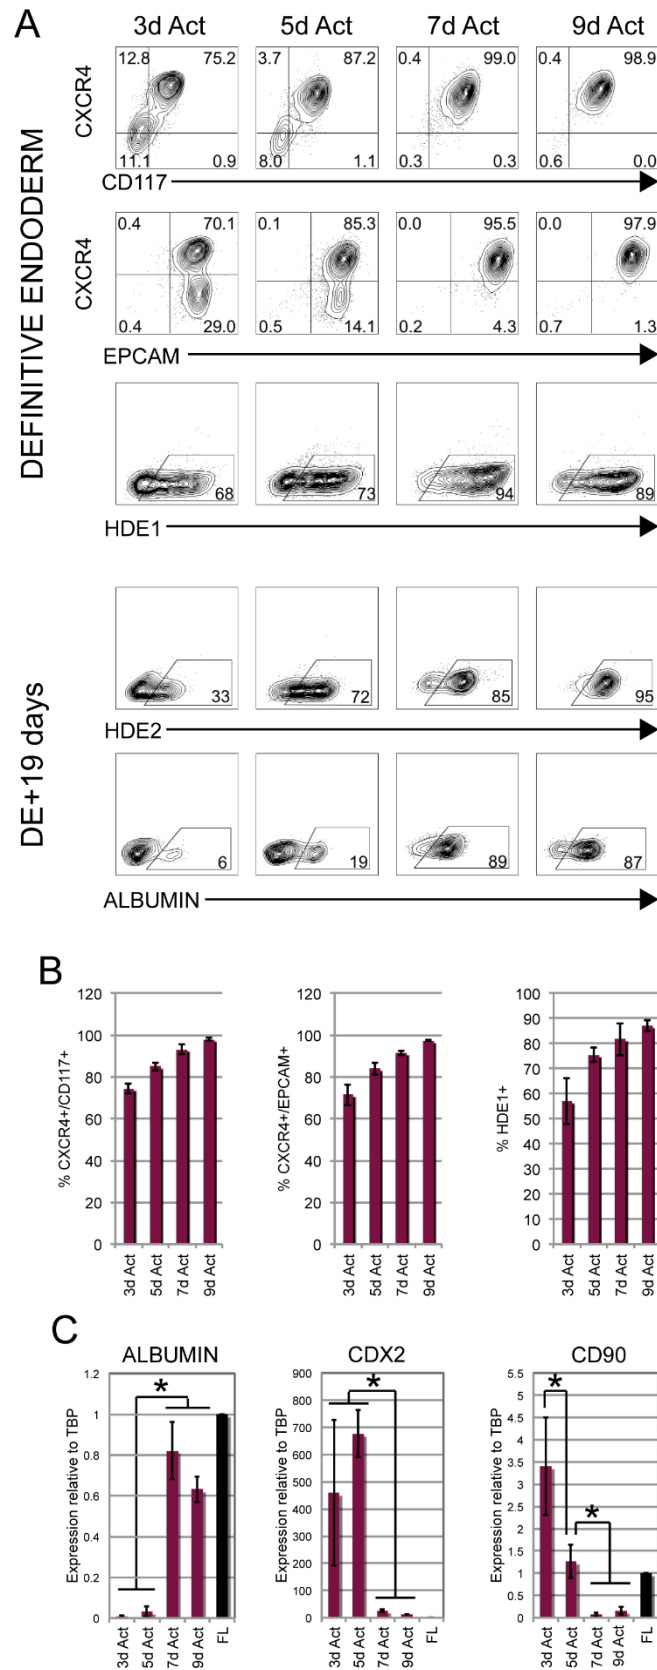

**Figure S6. Hepatic potential of BJ hIPSC-derived endoderm correlates with HDE1 staining patterns.** (A) Upper three rows: representative flow cytometric analysis showing the proportion of CXCR4<sup>+</sup>, CD117<sup>+</sup> EPCAM<sup>+</sup> and HDE1<sup>+</sup> cells in BJ hIPSC-derived endoderm populations induced with activin A for the indicated period of time (days). Lower two rows:

representative flow cytometric analysis showing the proportion of HDE2<sup>+</sup> and ALB<sup>+</sup> cells in hepatic cultures generated from endoderm induced for the indicated periods of time. Cells were analyzed 19 days following the endoderm stage (DE+19 days). (B) Flow cytometric analysis showing the proportion of CXCR4<sup>+</sup>CD117<sup>+</sup> cells, CXCR4<sup>+</sup>EPCAM<sup>+</sup> cells and HDE1<sup>+</sup> cells in BJ hPSC-derived populations induced with activin A for the indicated periods of time. (n=3, data are represented as mean +/- SEM). (C) RT-qPCR analyses of *ALB*, *CDX2* and *CD90* expression in the BJ hPSC-derived hepatic populations (DE+19) generated from the endoderm induced with activin A for different periods of time. (FL=Fetal Liver). Values were determined relative to TBP and compared to fetal liver (FL set at 1, n=3, data are represented as mean +/- SEM. \* indicates p<0.05).

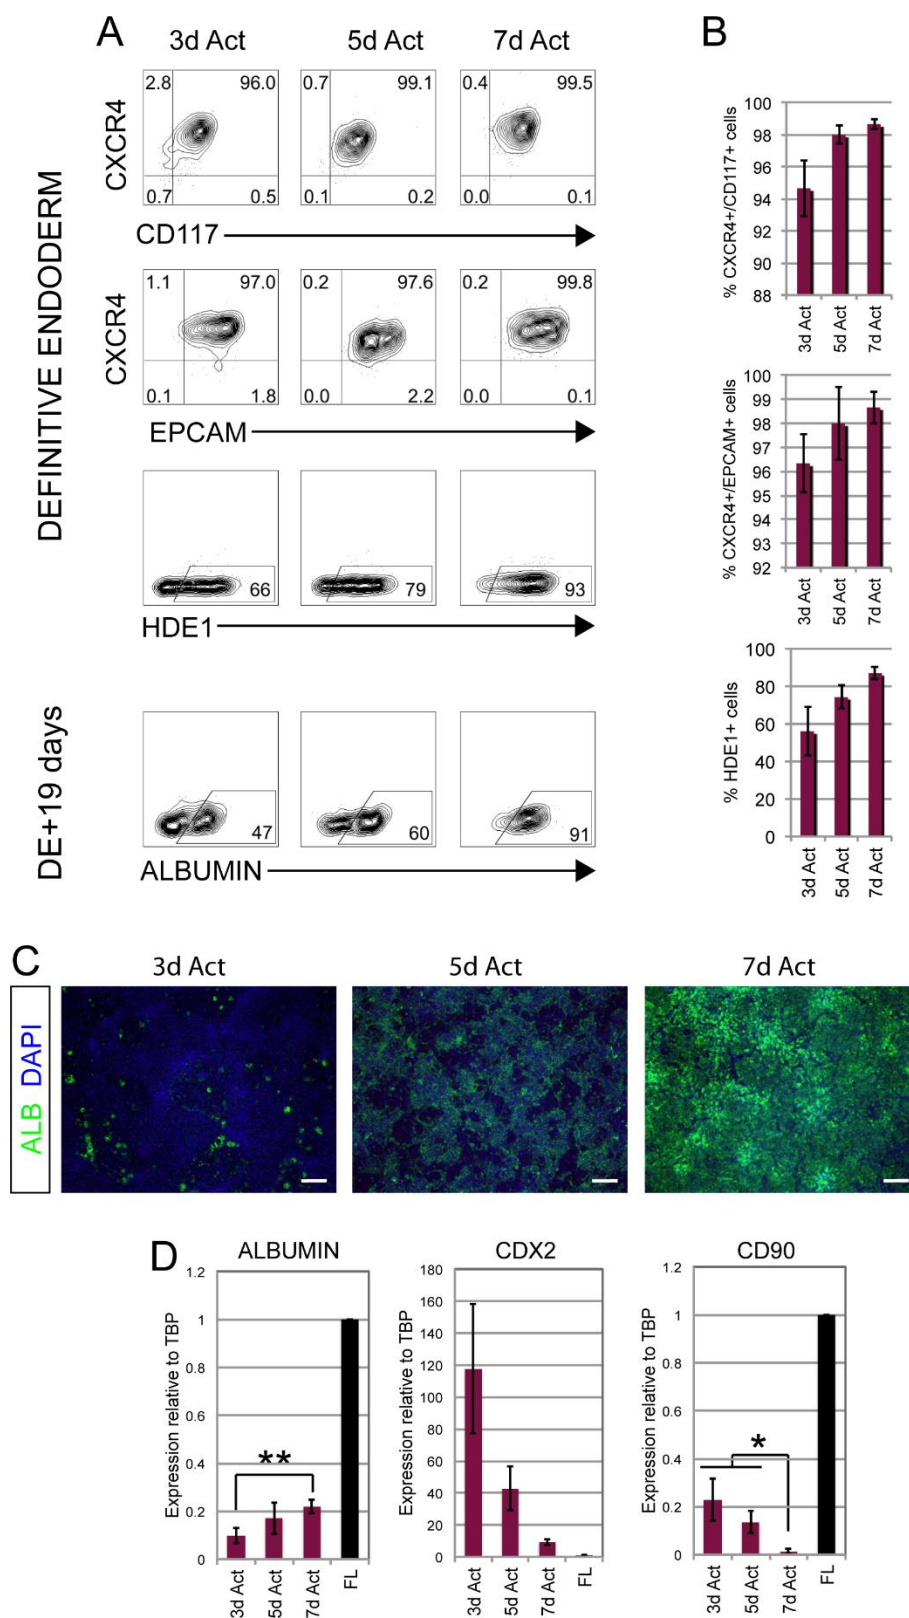

**Fig. S7. Hepatic potential of MSC-iPS1 hiPSC-derived endoderm correlates with HDE1 staining patterns.** (A) Upper three rows: representative flow cytometric analysis showing the proportion of CXCR4<sup>+</sup>, CD117<sup>+</sup> EPCAM<sup>+</sup> and HDE1<sup>+</sup> cells in MSC-iPS1 hiPSC-derived endoderm populations induced with activin A for the indicated period of time (days). Lower row: representative flow cytometric analysis showing the proportion of and ALB<sup>+</sup> cells in hepatic cultures generated from endoderm induced for the indicated periods of time. Cells



were analyzed 19 days following the endoderm stage (DE+19 days). (B) Flow cytometric analysis showing the proportion of CXCR4<sup>+</sup>CD117<sup>+</sup> cells, CXCR4<sup>+</sup>EPCAM<sup>+</sup> cells and HDE1<sup>+</sup> cells in MSC-iPS1 hiPSC-derived populations induced with activin A for the indicated periods of time. (n=3, data are represented as mean +/- SEM). (C) Immunocytochemistry analyses of ALB (green) expression in MSC-iPS1 hiPSC-derived hepatic populations following 19 days of culture of definitive endoderm stage induced with activin A for the indicated period of time (days). Scale bars: 200  $\mu$ m. (D) RT-qPCR analyses of *ALB*, *CDX2* and *CD90* expression in the MSC-iPS1 hiPSC-derived hepatic populations (DE+19) generated from the endoderm induced with activin A for the indicated periods of time. (FL=Fetal Liver). Values were determined relative to TBP and compared to fetal liver (FL set at 1, n=3, data are represented as mean +/- SEM. \* indicates p<0.05. \*\* indicates p<0.01).

**Table S1. Primary antibody list**

| Antibody        | Company                      | Catalogue number | Ig Species | Conjugate | Dilution                     |
|-----------------|------------------------------|------------------|------------|-----------|------------------------------|
| HDE1            | n/a                          | n/a              | Mouse IgG1 | none      | 1:100 (flow and IHC)         |
| HDE2            | n/a                          | n/a              | Mouse IgG1 | None      | 1:100 (flow and IHC)         |
| SOX17           | R&D                          | MAB1924          | Mouse      | None      | 1:40                         |
| CXCR4 (CD184)   | BD                           | 555976           | Mouse      | APC       | 1:50                         |
| CD117           | BD                           | 340529           | Mouse      | PE        | 1:25                         |
| EPCAM (CD326)   | eBioscience                  | 12-9326-42       | Mouse      | PE        | 1:100                        |
| KDR             | R&D                          | FAB357A          | Mouse      | APC       | 15:100                       |
| KDR             | R&D                          | FAB357P          | Mouse      | PE        | 15:100                       |
| PDGFRa (CD140a) | BD                           | 556002           | Mouse      | PE        | 1:20                         |
| CD56            | BD                           | 555518           | Mouse      | APC       | 1:20                         |
| ALBUMIN         | Bethyl                       | A80-129A         | Goat       | None      | 1:200 (flow)<br>1:400 (IHC)  |
| ALBUMIN         | DAKO                         | A0001            | Rabbit     | None      | 1:400 (flow)<br>1:4000 (IHC) |
| AFP             | DAKO                         | A00008           | Rabbit     | None      | 1:2000                       |
| CD90            | Biolegend                    | 328110           | Mouse      | PE        | 1:400                        |
| 5H10            | Streeter lab                 | n/a              | Mouse IgM  | None      | 50ul (supernatant)           |
| HICO 3-C5       | Streeter lab                 | n/a              | Mouse IgM  | None      | 50ul (supernatant)           |
| c-peptide       | Beta Cell Biology Consortium | AB1921           | Rat        | None      | 1:300 (flow)<br>1:1000 (IHC) |

**Table S2. IgG control list**

| Antibody   | Company                | Catalogue number | Conjugate | Stock concentration |
|------------|------------------------|------------------|-----------|---------------------|
| Goat IgG   | Sigma                  | I5256            | none      | 1mg/ml              |
| Rabbit IgG | Jackson Immunoresearch | 001-000-003      | None      | 11mg/ml             |
| Mouse IgG1 | Life technologies      | MG105            | APC       | 4.1mg/ml            |

**Table S3. Secondary antibody list**

| Antibody               | Company                | Product Code | Conjugate | Dilution |
|------------------------|------------------------|--------------|-----------|----------|
| Goat anti-Mouse IgG    | Jackson immunoresearch | 115-115-164  | PE        | 1:200    |
| Goat anti-Mouse IgM    | Jackson immunoresearch | 115-096-075  | FITC      | 1:100    |
| Goat anti-Mouse IgG    | Jackson immunoresearch | 115-165-164  | Cy3       | 1:200    |
| Donkey anti-Rat IgG    | Life technologies      | A21208       | Alexa488  | 1:400    |
| Donkey anti-Goat IgG   | Life technologies      | A11055       | Alexa488  | 1:400    |
| Donkey anti-Rabbit IgG | Life technologies      | A11008       | Alexa488  | 1:400    |
| Donkey anti-Rabbit IgG | Jackson immunoresearch | 711-165-152  | Cy3       | 1:300    |

**Table S4. RT-qPCR primer list**

| <b>GENE</b> | <b>Forward sequence</b>         | <b>Reverse sequence</b>        |
|-------------|---------------------------------|--------------------------------|
| ALBUMIN     | 5'-GTGAAACACAAGCCCAAGGCAACA-3'  | 5'-TCAGCCTTGCAGCACTTCTCTACA-3' |
| CD90        | 5'-ATACCAGCAGTTCACCCATTTCAGT-3' | 5'-AATTGCTGGTGAAGTTGGTTCGGG-3' |
| CER         | 5'-CTTGTCTCAGCTCTGCCACTAACT-3'  | 5'-TCATCTAGGTCCGGTCCGTCATTT-3' |
| CXCR4       | 5'-AGGGAAGTGAACATTCCAGAGCGT-3'  | 5'-AAACGTTCCACGGGAATGGAGAGA-3' |
| FOXA2       | 5'-GCATTCCCAATCTTGACACGGTGA-3'  | 5'-GCCCTTGCAGCCAGAATACACATT-3' |
| MEOX1       | 5'-TGAGGACTGATGGCCAAAGAGCAT-3'  | 5'-ATCCAAACTCACGTTGACCTCCCT-3' |
| MESP1       | 5'-AGCCCAAGTGACAAGGGACAAC-3'    | 5'-AAGGAACCACTTCGAAGGTGCTGA-3' |
| OCT4        | 5'-ATGCATTCAAACGAGGTGCCTGC-3'   | 5'-CCACCCTTTGTGTTCCCAATTCCT-3' |
| SOX17       | 5'-AGGAAATCCTCAGACTCCTGGGTT-3'  | 5'-CCCAAACGTTCAAGTGGCAGACA-3'  |
| SOX7        | 5'-AGCATGCTTCCTTTAGCTGCTGTG-3'  | 5'-TTGCTCTAAAGCACTGGCTGAGGA-3' |
| TBP         | 5'-GCGCAAGGGTTTCTGGTTTGCC-3'    | 5'-AGGGATTCCGGGAGTCATGGC-3'    |
| ZIC1        | 5'-GTCTTCGCGCGCTCCGAGAATT-3'    | 5'-CTTGCGGTCGCTGCTGTTAGCG-3'   |
